# Supplementary material for: Dispersion and parallel assembly of sulfonated graphene in waterborne epoxy anticorrosion coatings
Source: Royal Society of Chemistry journal article supplement (doi:10.1039/c9ta03995c), 2019-01-01
Supplement: c9ta03995c1.pdf [file c9ta03995c1.pdf]

## Supplementary Information

### Dispersion and parallel assembly of sulfonated graphene in waterborne epoxy anticorrosion coatings

Zhenwei LI, Jing Li\*, Jincan Cui, Hanxun Qiu, Guangzhi Yang, Shiyong Zheng, Junhe Yang

School of Materials Science and Engineering, University of Shanghai for Science and Technology,

No.516 Jungong Road, Shanghai 200093, China

\*Corresponding author. E-mail: [lijing6080@usst.edu.cn](mailto:lijing6080@usst.edu.cn) (J. Li).

The morphology of SG and fracture surfaces of the SG/WEP coatings was observed by scanning electron microscope (SEM, FEI Quanta FEG) with an accelerating voltage of 20 kV. Atomic force microscopy (AFM, AR-Cypher ES Oxford Instruments) images were obtained in non-contact mode. Raman spectroscopy was excited using a LabRAM spectrometer with a laser of 532 nm.

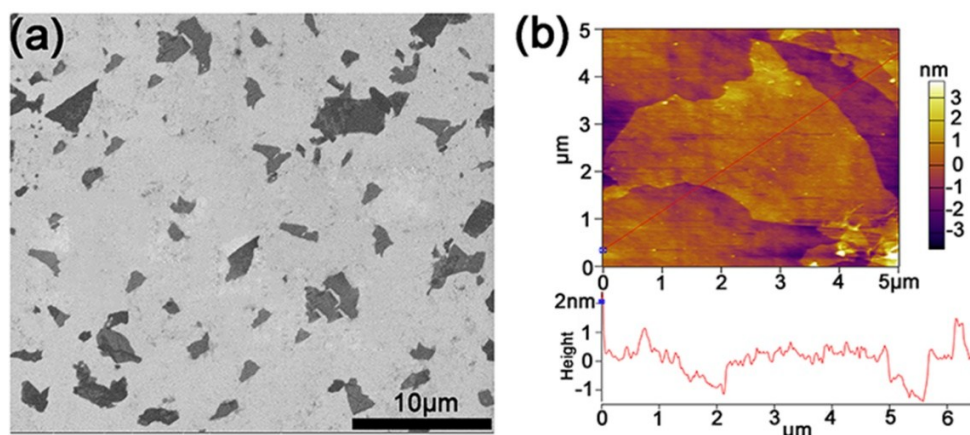

**Fig. S1.** (a) SEM image of SG nanosheets on Si/SiO<sub>2</sub> substrate. (b) AFM image of SG nanosheets on Si substrate.

The morphologies of SG nanosheets were shown in Fig. S1. The lateral size of SG nanosheets was about 4  $\mu\text{m}$  on average, as shown in the SEM image. The thickness of SG nanosheets was around 1 nm, as measured by AFM, indicating that SG was composed of single atomic layer.

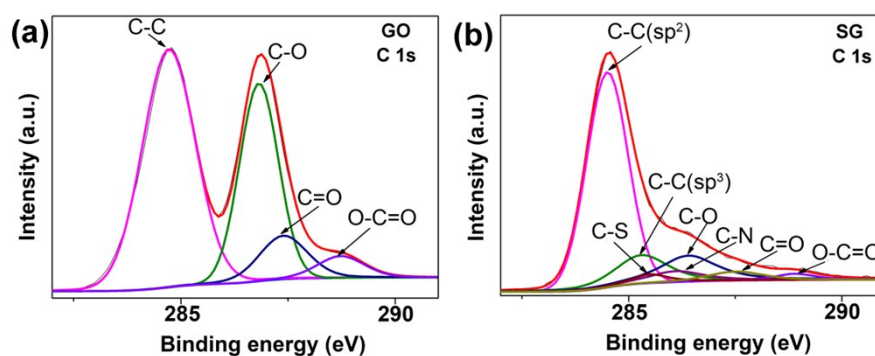

**Fig. S2.** XPS spectra of GO (a) and SG (b).

The C1s XPS spectrum of GO (Fig. S2a) showed a considerable degree of oxidation with functional groups including C–O (286.2 eV), C=O (287.8 eV) and O–C = O (289.0 eV). The C1s XPS spectrum of the SG, in Fig. S2b, the intensities of the peaks corresponding to C–O (286.2 eV), C=O (287.8 eV) and O–C = O (289.0 eV) were decreased, while the additional components at 285.3 and 285.9 eV were assigned to the C–S and C–N bonds.

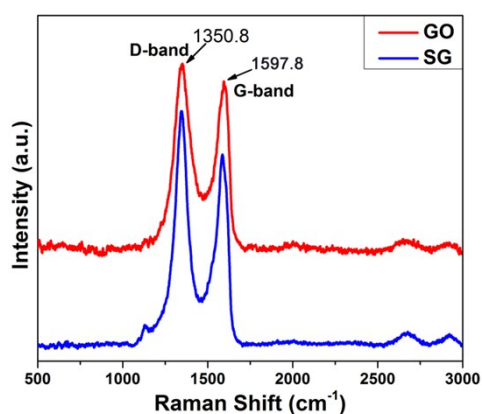

**Fig. S3.** Raman spectra of GO and SG.

Fig. S3 showed the Raman spectra of GO and SG. The G band at  $\sim 1597.8 \text{ cm}^{-1}$  associated with the vibration of  $\text{sp}^2$  carbon atoms in a graphitic 2D hexagonal lattice; The D band at  $\sim 1350.8 \text{ cm}^{-1}$  related to the vibrations of  $\text{sp}^3$  carbon atoms of defects and disorder<sup>1</sup>. The intensity ratio of the D band to the G band increased from 1.086 (for GO) to 1.192 (for SG) after the reduction and sulfonation process, suggesting an increased number of smaller graphitic domains formed during the reduction process<sup>2</sup>.

Fig. S4 showed the SEM morphologies of the fracture surfaces of the coatings. The thickness of the composite coatings was about  $15 \mu\text{m}$ . All the coatings showed smooth fracture surface, indicating a good dispersion of SG. With low magnification, the uniform distribution of SG was shown Fig. S5.

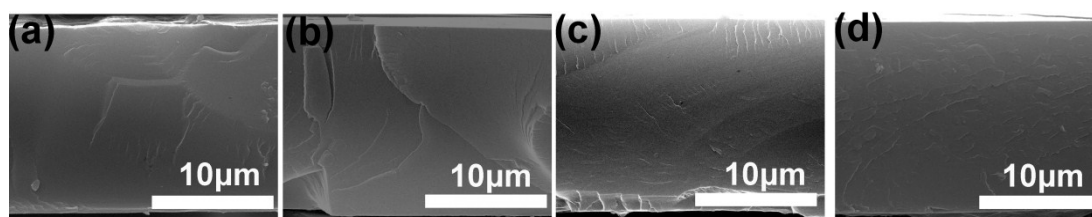

**Fig. S4.** SEM micrographs of fractured surfaces of (a) SG-0, (b) SG-0.2, (c) SG-0.5 and (d) SG-1.0.

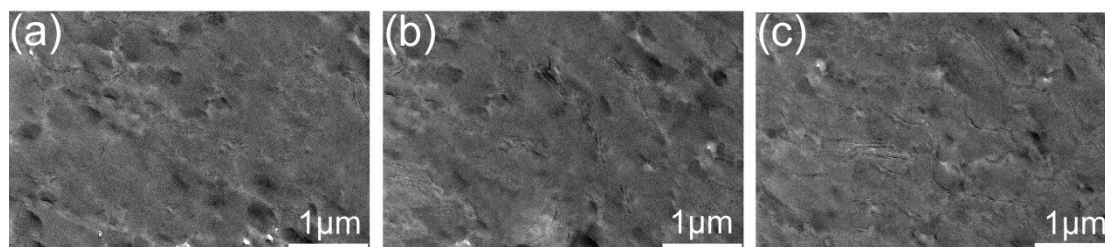

**Fig. S5.** TEM micrographs of (a) SG-0.2, (b) SG-0.5 and (c) SG-1.0.

The EIS results were fitted by the equivalent circuits in Fig. S6. A constant phase element (CPE) was utilized to represent a shift from the ideal capacitor during the real electrochemical process. The impedance plots with one time constant were simulated by the equivalent circuit of Fig. S6a, where  $R_s$  represents the solution resistance,  $R_c$  is the resistance of coating and  $CPE_c$  is the calibration of the capacitance of coating. The equivalent circuit of Fig. S6b was used to simulate the data for the impedance plots with two time constant, where  $CPE_{dl}$  was used to represent the double layer capacitance at the metal/coating interface,  $R_{ct}$  is the charge transfer resistance of corrosion electrochemical reaction at the interface. The electrical parameters ( $R_c$ ,  $CPE_c$ ,  $CPE_{dl}$  and  $n$ ) obtained from the curve fitting were presented in Table S1.

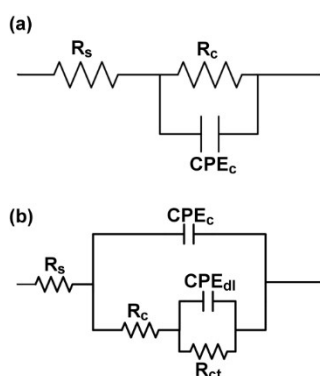

**Fig. S6.** Equivalent circuits used to fit the EIS data with (a) one time constant, (b) two time constants.

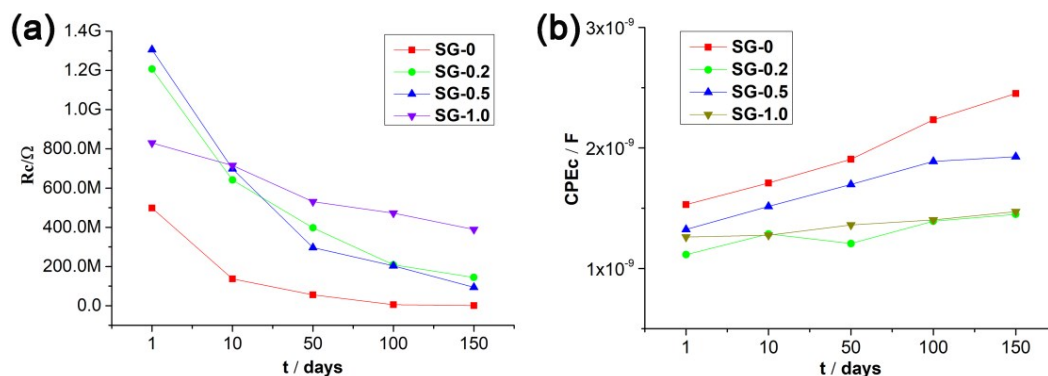

**Fig. S7.** Evolution of (a)  $R_c$  and (b)  $CPE_c$  of the coatings with immersion duration.

**Table S1.** Fitting results of the EIS plots of the different coatings

| Samples                 | Time (day) | $R_c$ ( $\Omega$ )  | $CPE_c$ (F)             | $n_c$  | $CPE_{dl}$ (F)         | $n_{dl}$ |
|-------------------------|------------|---------------------|-------------------------|--------|------------------------|----------|
| Pure WEP coatings       | 1          | $4.979 \times 10^8$ | $1.530 \times 10^{-9}$  | 0.9386 | --                     | --       |
|                         | 10         | $1.368 \times 10^8$ | $1.710 \times 10^{-9}$  | 0.9208 | --                     | --       |
|                         | 50         | $5.547 \times 10^7$ | $1.906 \times 10^{-9}$  | 0.9004 | --                     | --       |
|                         | 100        | $4.741 \times 10^6$ | $2.234 \times 10^{-9}$  | 0.8546 | $1.086 \times 10^{-6}$ | 0.9146   |
|                         | 150        | $6.693 \times 10^5$ | $8.352 \times 10^{-10}$ | 0.9357 | $9.125 \times 10^{-7}$ | 0.6962   |
| 0.2 wt% SG/WEP coatings | 1          | $1.207 \times 10^9$ | $1.915 \times 10^{-9}$  | 0.903  | --                     | --       |
|                         | 10         | $6.411 \times 10^8$ | $1.286 \times 10^{-9}$  | 0.939  | --                     | --       |
|                         | 50         | $3.972 \times 10^8$ | $1.207 \times 10^{-9}$  | 0.944  | --                     | --       |
|                         | 100        | $2.085 \times 10^8$ | $1.393 \times 10^{-9}$  | 0.929  | --                     | --       |
|                         | 150        | $1.443 \times 10^8$ | $1.450 \times 10^{-9}$  | 0.929  | --                     | --       |
| 0.5 wt% SG/WEP coatings | 1          | $1.306 \times 10^9$ | $1.323 \times 10^{-9}$  | 0.9395 | --                     | --       |
|                         | 10         | $6.986 \times 10^8$ | $1.515 \times 10^{-9}$  | 0.9274 | --                     | --       |
|                         | 50         | $2.961 \times 10^8$ | $1.997 \times 10^{-9}$  | 0.9087 | --                     | --       |
|                         | 100        | $2.037 \times 10^8$ | $2.089 \times 10^{-9}$  | 0.9089 | --                     | --       |
|                         | 150        | $9.423 \times 10^7$ | $2.828 \times 10^{-9}$  | 0.8952 | --                     | --       |
| 1.0 wt% SG/WEP coatings | 1          | $8.303 \times 10^8$ | $1.261 \times 10^{-9}$  | 0.9317 | --                     | --       |
|                         | 10         | $7.156 \times 10^8$ | $1.276 \times 10^{-9}$  | 0.9283 | --                     | --       |
|                         | 50         | $5.307 \times 10^8$ | $1.361 \times 10^{-9}$  | 0.9232 | --                     | --       |
|                         | 100        | $4.724 \times 10^8$ | $1.403 \times 10^{-9}$  | 0.9210 | --                     | --       |
|                         | 150        | $3.891 \times 10^8$ | $1.471 \times 10^{-9}$  | 0.9173 | --                     | --       |

The electrochemical parameters  $R_c$  and  $CPE_c$  were plotted in Fig. S7a and b as a function of immersion duration. A higher  $R_c$  implied that less electrolytes were penetrated into the coatings.  $R_c$  values decrease with increasing immersion time for all coating systems.  $R_c$  of the SG-1.0 coating was found to be the highest among all the coatings after immersion for 10 days.  $CPE_c$  was increased with the absorption of electrolytes<sup>3</sup>. As shown in Fig. S7 (b), the  $CPE_c$  increased with the immersion duration. The incorporation of SG nanosheets had two effects on the absorption of electrolytes: 1) they blocked the penetration of electrolytes in the coatings; 2) they absorbed more electrolytes at the SG/WEP interfaces due to the existence of hydrophilic sulfonic acid groups. Therefore, the  $CPE_c$  values changed with different SG content, but they were smaller than the

CPE<sub>c</sub> values of SG-0.

## References

1. E. Goki and C. Manish, *Adv. Mater.*, 2010, **22**, 2392-2415.
2. K. Haubner, J. Murawski, P. Olk, L. M. Eng, C. Ziegler, B. Adolphi and E. Jaehne, *Chemphyschem.*, 2010, **11**, 2131-2139.
3. M. Y. Jiang, L. K. Wu, J. M. Hu and J. Q. Zhang, *Corros. Sci.*, 2015, **92**, 118-126.
